# Supplementary material for: Los Fernández-Shaw, una saga de libretistas
Source: Springer Nature journal article supplement (doi:10.1186/s12864-017-3925-x), 2015-01-01

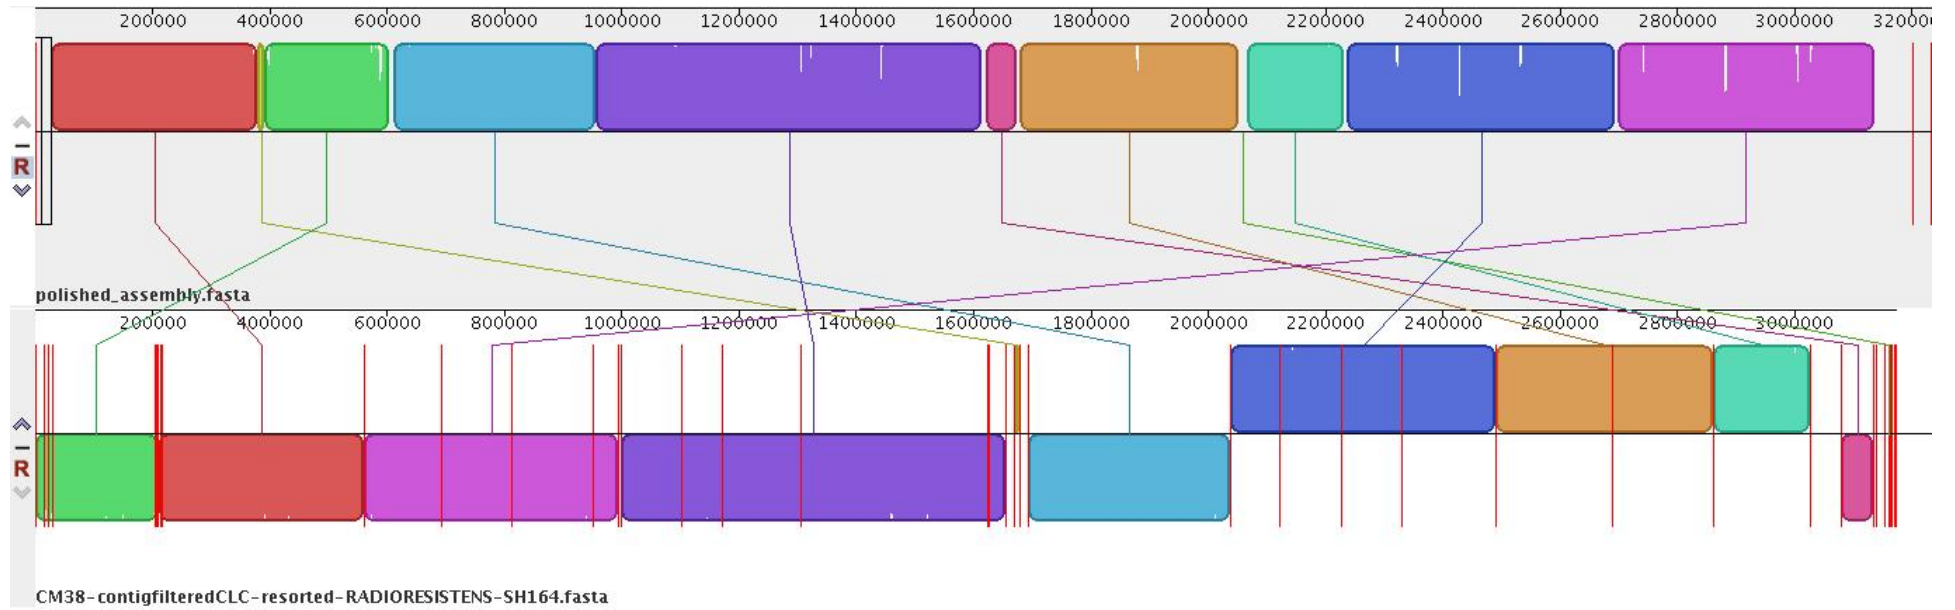

Supplement: MOESM2 [file 12864_2017_3925_MOESM2_ESM.pdf]
